# Supplementary material for: Functionalized cyano-OPVs as melt-processable two-photon absorbers
Source: Royal Society of Chemistry journal article supplement (doi:10.1039/c2jm15846a), 2012-01-01
Supplement: c2jm15846a.pdf [file c2jm15846a.pdf]

## SUPPORTING INFORMATION

### Functionalized Cyano-OPVs as Melt-Processable Two-Photon Absorbers

Brian T. Makowski,<sup>a</sup> Joseph Lott,<sup>a</sup> Brent Valle,<sup>b</sup> Kenneth D. Singer<sup>b\*</sup> and Christoph Weder<sup>a,c\*</sup>

<sup>a</sup>Department of Macromolecular Science and Engineering and <sup>b</sup>Department of Physics, Case Western Reserve University, Cleveland OH, 44106, USA. <sup>c</sup>Adolphe Merkle Institute and Fribourg Center for Nanomaterials, University of Fribourg, CH-1723 Marly 1, Switzerland, E-mail: kenneth.singer@case.edu, christoph.weder@unifr.ch

#### Single Crystal X-ray Diffraction Procedure for Dye A3

The dye **A3** was crystallized by dissolving in benzene, filling 1 inch of a glass Pasteur pipette which had previously been sealed with a Bunsen burner, then adding a layer of methanol (1 inch) and allowing diffusion into the benzene layer over time. Single-crystal diffraction study was done on a Bruker AXS SMART APEX II CCD diffractometer using monochromatic Mo K $\alpha$  radiation with the omega scan technique. The unit cell was determined using SMART<sup>1</sup> and SAINT+.<sup>2</sup> Data collection for compound **A3** was conducted at 100 K (-173.5 °C). The structure was solved by the direct method and refined by full matrix least squares against  $F^2$  with all reflections using SHELXTL.<sup>3</sup> Refinement of extinction coefficients was found to be insignificant. All non-hydrogen atoms were refined anisotropically. All hydrogen atoms were placed in standard calculated positions and all hydrogen atoms were refined with an isotropic displacement parameter 1.2 times that of the adjacent carbon.

---

<sup>1</sup> Bruker Advanced X-ray Solutions. SMART for WNT/2000 (Version 5.628); Bruker AXS Inc.: Madison, WI, 1997–2002.

<sup>2</sup> Bruker Advanced X-ray Solutions. SAINT (Version 6.45); Bruker AXS Inc.: Madison, WI, 1997–2003.

<sup>3</sup> Bruker Advanced X-ray Solutions. SHELXTL (Version 6.10); Bruker AXS Inc.: Madison, WI, 2000.

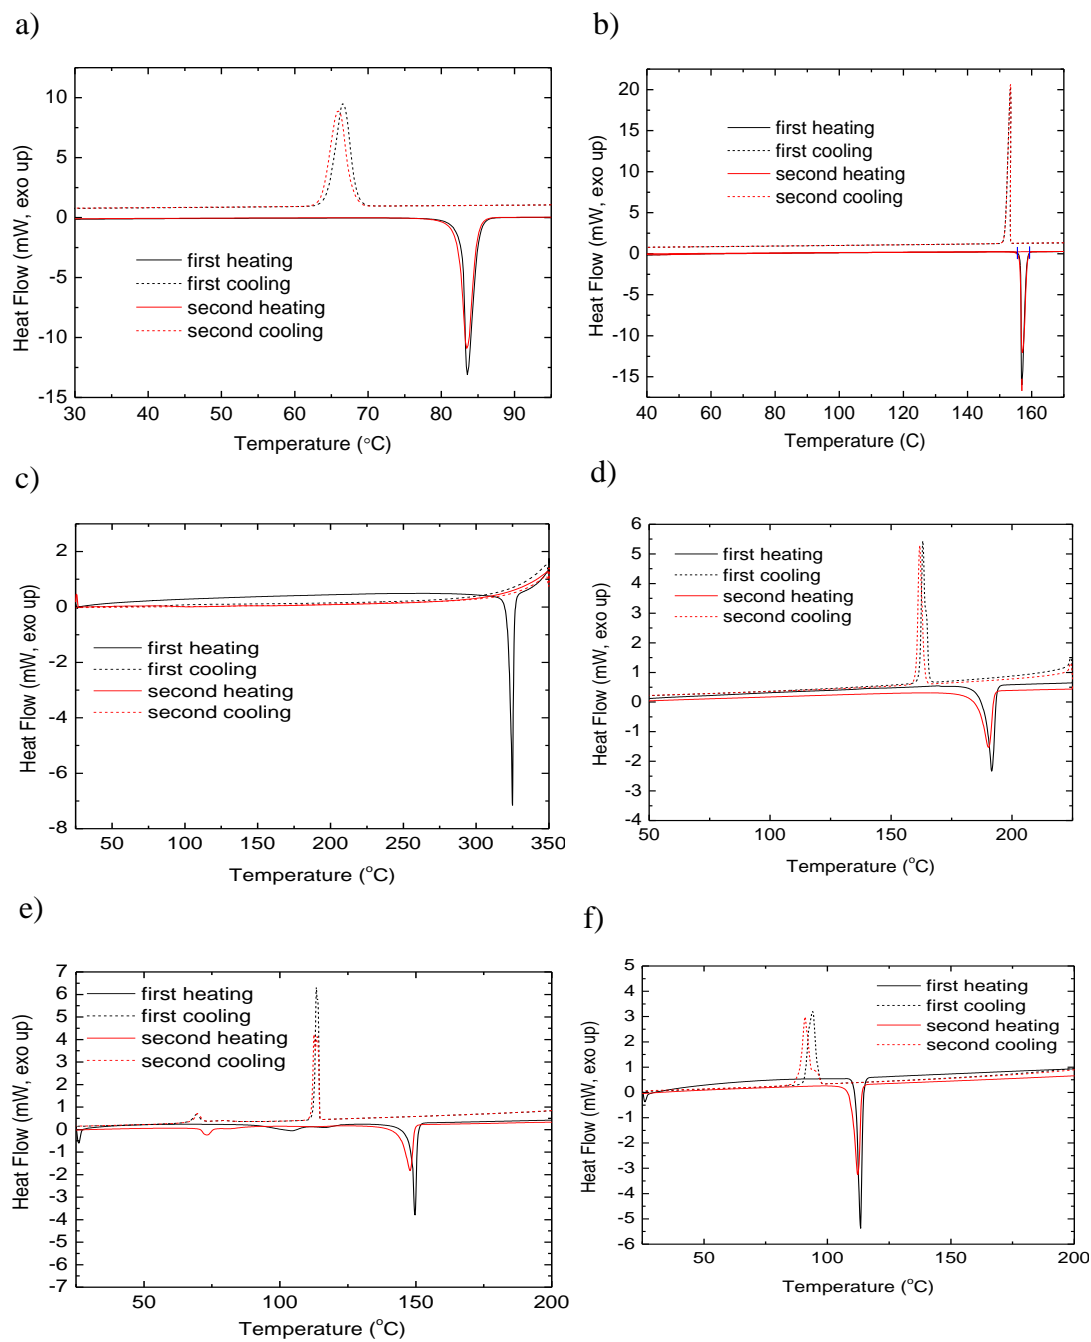

**Figure S1.** Differential scanning calorimetry (DSC) traces (heating rate 10 °C/min) of a) **A4**, b) **B2**, c) **C1**, d) **C2**, e) **D1**, and f) **D2**.

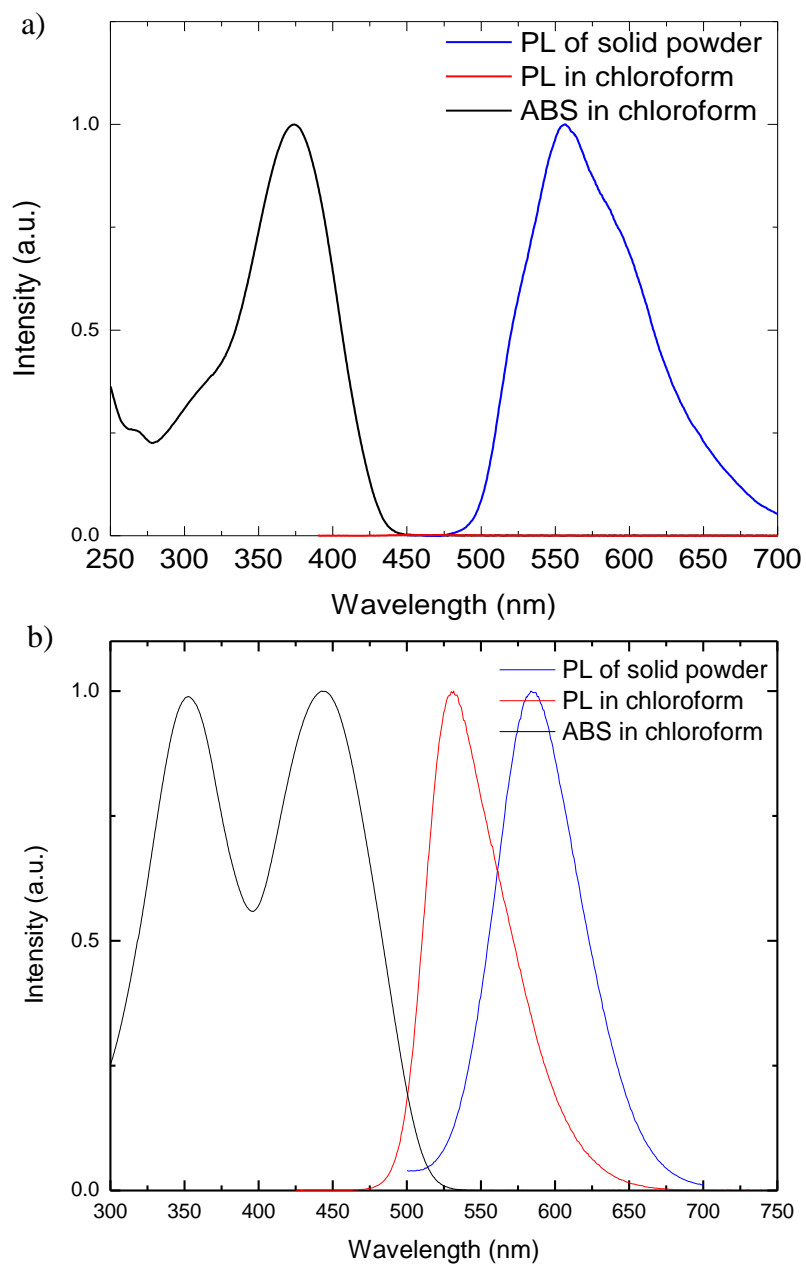

**Figure S2.** UV-Vis absorbance and fluorescence spectra (excitation at 365 nm) of a  $\text{CHCl}_3$  solution and solid powder of a) **C1** and b) **D2**.

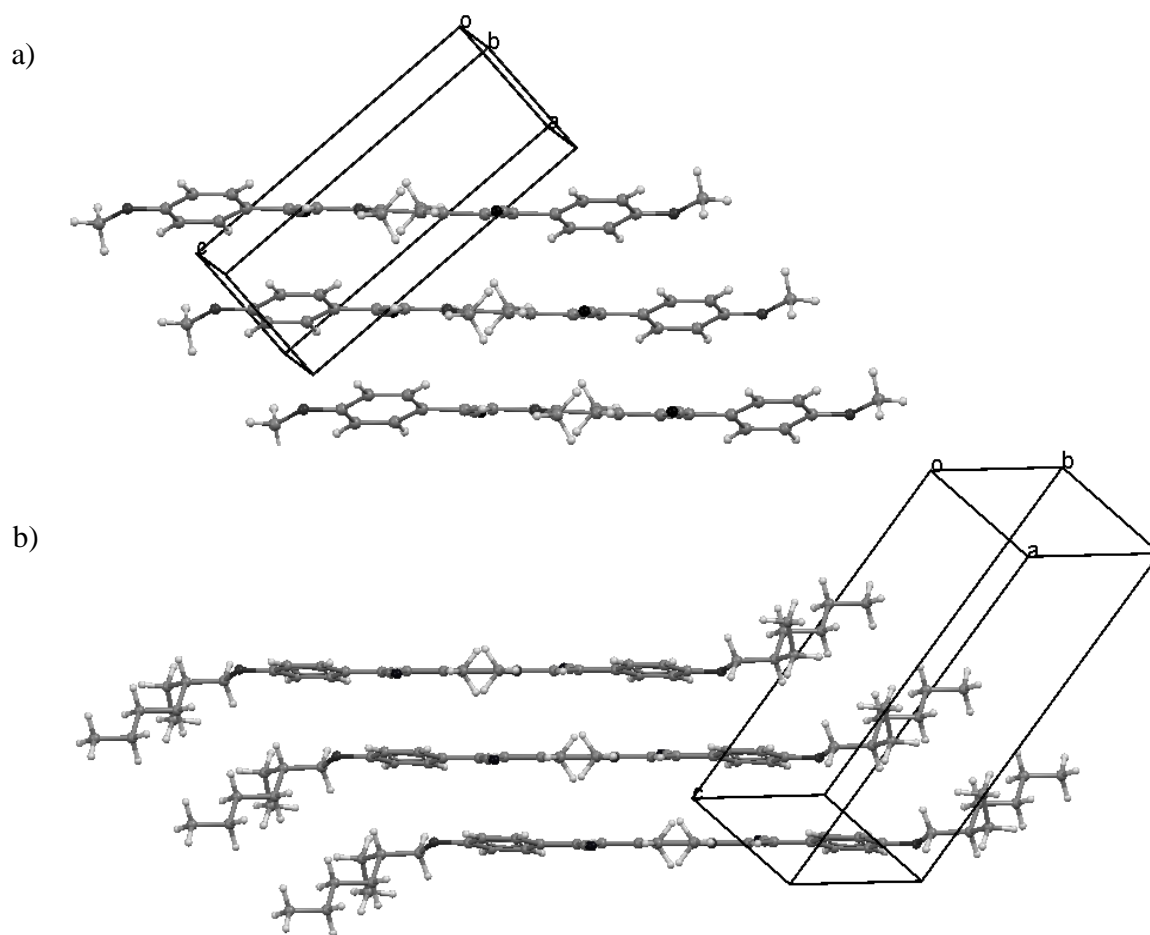

**Figure S3.** Crystal structures for a) **A1** and b) **A3**.

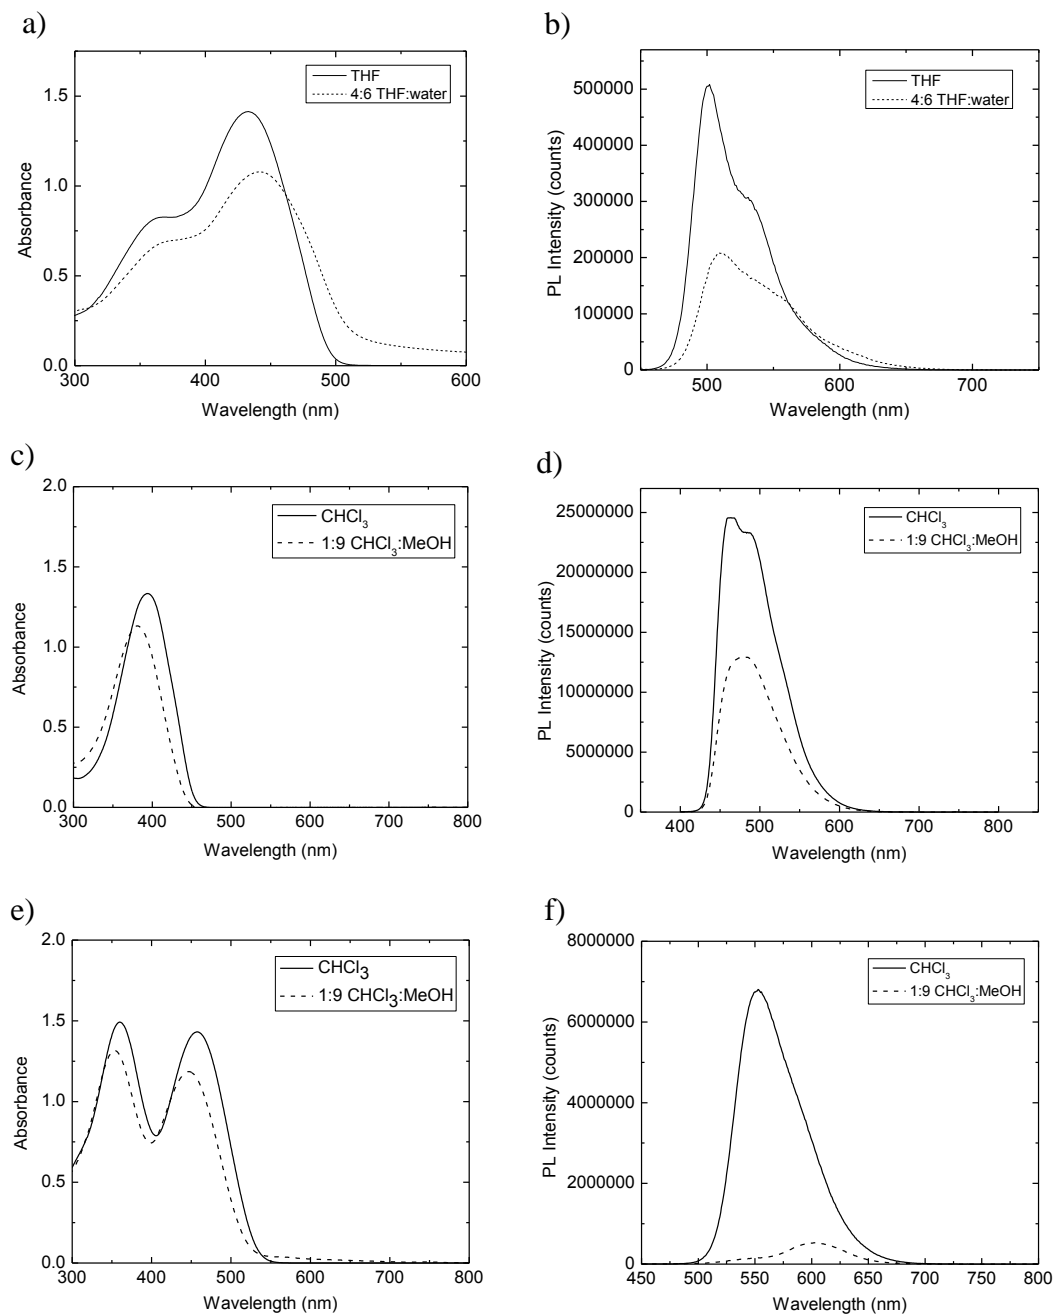

**Figure S4.** Excimer screening experiments for dyes **A3** (a,b), **B2** (c,d), and **C2** (e,f). The absorbance (a,c,e) and PL spectra (b,d,f) in a good solvent and a good solvent:poor solvent mixture (labeled in the figure) were measured for each dye at the same concentration ( $\sim 4\text{-}5 \times 10^{-5}$  M).

**Table S1.** Crystal data and structure refinement for **A3**.

|                                   |                                                                                                                 |
|-----------------------------------|-----------------------------------------------------------------------------------------------------------------|
| Identification code               | brianmakowski1_0m                                                                                               |
| Empirical formula                 | C42 H52 N2 O4                                                                                                   |
| Formula weight                    | 648.86                                                                                                          |
| Temperature                       | 100(2) K                                                                                                        |
| Wavelength                        | 0.71073 Å                                                                                                       |
| Crystal system, space group       | Triclinic, P-1                                                                                                  |
| Unit cell dimensions              | a=5.7621(11) Å alpha=93.949(2) deg.<br>b=9.2731(17) Å beta=93.856(2) deg.<br>c=16.516(3) Å gamma=92.524(2) deg. |
| Volume                            | 877.4(3) Å <sup>3</sup>                                                                                         |
| Z, Calculated density             | 1, 1.228 Mg/m <sup>3</sup>                                                                                      |
| Absorption coefficient            | 0.078 mm <sup>-1</sup>                                                                                          |
| F(000)                            | 350                                                                                                             |
| Crystal size                      | 0.47 x 0.23 x 0.10 mm                                                                                           |
| Theta range for data collection   | 2.20 to 27.71 deg.                                                                                              |
| Limiting indices                  | -7<=h<=7, -11<=k<=12, -21<=l<=21                                                                                |
| Reflections collected / unique    | 10514 / 4019 [R(int) = 0.0275]                                                                                  |
| Completeness to theta =27.71      | 97.6 %                                                                                                          |
| Absorption correction             | Multi-scan                                                                                                      |
| Max. and min. transmission        | 0.9922 and 0.9641                                                                                               |
| Refinement method                 | Full-matrix least-squares on F <sup>2</sup>                                                                     |
| Data / restraints / parameters    | 4019 / 0 / 220                                                                                                  |
| Goodness-of-fit on F <sup>2</sup> | 1.037                                                                                                           |
| Final R indices [I>2sigma(I)]     | R1 = 0.0719, wR2 = 0.1891                                                                                       |
| R indices (all data)              | R1 = 0.0906, wR2 = 0.2034                                                                                       |

Largest diff. peak and hole 1.138 and -0.531 e.Å<sup>-3</sup>

**Table S2.** Atomic coordinates ( $\times 10^4$ ) and equivalent isotropic displacement parameters ( $\text{\AA}^2 \times 10^3$ ) for **A3**.  $U(\text{eq})$  is defined as one third of the trace of the orthogonalized  $U_{ij}$  tensor.

|        | x         | y         | z         | U (eq) |
|--------|-----------|-----------|-----------|--------|
| O (2)  | -5081 (3) | -2031 (2) | 10072 (1) | 23 (1) |
| O (1)  | 5639 (3)  | 538 (2)   | 7291 (1)  | 30 (1) |
| C (8)  | 4920 (5)  | 1975 (2)  | 7158 (2)  | 30 (1) |
| C (5)  | 6701 (5)  | 2650 (3)  | 6656 (2)  | 36 (1) |
| C (4)  | 6620 (6)  | 1859 (3)  | 5811 (2)  | 43 (1) |
| C (6)  | 6361 (6)  | 4277 (3)  | 6625 (2)  | 45 (1) |
| C (2)  | 8445 (5)  | 1529 (3)  | 4485 (2)  | 40 (1) |
| C (3)  | 8552 (6)  | 2352 (3)  | 5297 (2)  | 43 (1) |
| C (7)  | 4116 (7)  | 4731 (3)  | 6212 (2)  | 55 (1) |
| C (1)  | 10373 (5) | 2011 (3)  | 3968 (2)  | 43 (1) |
| C (12) | 1346 (4)  | -2429 (2) | 8328 (1)  | 18 (1) |
| C (13) | 3361 (4)  | -2816 (2) | 7960 (1)  | 20 (1) |
| C (10) | 2154 (4)  | 49 (2)    | 8001 (1)  | 23 (1) |
| C (14) | 4747 (4)  | -1807 (2) | 7624 (1)  | 23 (1) |
| C (9)  | 4152 (4)  | -368 (2)  | 7640 (1)  | 22 (1) |
| C (11) | 778 (4)   | -983 (2)  | 8336 (1)  | 22 (1) |
| C (15) | -97 (4)   | -3537 (2) | 8693 (1)  | 18 (1) |
| C (16) | -1831 (4) | -3236 (2) | 9179 (1)  | 19 (1) |
| C (17) | -3404 (4) | -4166 (2) | 9585 (1)  | 18 (1) |
| C (18) | -3365 (4) | -5675 (2) | 9554 (1)  | 19 (1) |
| C (19) | -5091 (4) | -3504 (2) | 10046 (1) | 18 (1) |
| C (21) | 503 (4)   | -5006 (2) | 8491 (1)  | 21 (1) |
| N (1)  | 1015 (4)  | -6157 (2) | 8316 (1)  | 29 (1) |
| C (20) | -6827 (4) | -1331 (2) | 10500 (1) | 23 (1) |

**Table S3.** Bond length (Å) and angles (deg.) for **A3**.

---

|                   |           |
|-------------------|-----------|
| O (2) -C (19)     | 1.363 (2) |
| O (2) -C (20)     | 1.423 (2) |
| O (1) -C (9)      | 1.357 (3) |
| O (1) -C (8)      | 1.440 (3) |
| C (8) -C (5)      | 1.503 (3) |
| C (8) -H (8A)     | 0.9900    |
| C (8) -H (8B)     | 0.9900    |
| C (5) -C (4)      | 1.528 (4) |
| C (5) -C (6)      | 1.534 (4) |
| C (5) -H (5)      | 1.0000    |
| C (4) -C (3)      | 1.519 (4) |
| C (4) -H (4A)     | 0.9900    |
| C (4) -H (4B)     | 0.9900    |
| C (6) -C (7)      | 1.511 (5) |
| C (6) -H (6A)     | 0.9900    |
| C (6) -H (6B)     | 0.9900    |
| C (2) -C (3)      | 1.492 (4) |
| C (2) -C (1)      | 1.516 (4) |
| C (2) -H (2A)     | 0.9900    |
| C (2) -H (2B)     | 0.9900    |
| C (3) -H (3A)     | 0.9900    |
| C (3) -H (3B)     | 0.9900    |
| C (7) -H (7A)     | 0.9800    |
| C (7) -H (7B)     | 0.9800    |
| C (7) -H (7C)     | 0.9800    |
| C (1) -H (1A)     | 0.9800    |
| C (1) -H (1B)     | 0.9800    |
| C (1) -H (1C)     | 0.9800    |
| C (12) -C (11)    | 1.394 (3) |
| C (12) -C (13)    | 1.396 (3) |
| C (12) -C (15)    | 1.479 (3) |
| C (13) -C (14)    | 1.373 (3) |
| C (13) -H (13)    | 0.9500    |
| C (10) -C (11)    | 1.384 (3) |
| C (10) -C (9)     | 1.389 (3) |
| C (10) -H (10)    | 0.9500    |
| C (14) -C (9)     | 1.391 (3) |
| C (14) -H (14)    | 0.9500    |
| C (11) -H (11)    | 0.9500    |
| C (15) -C (16)    | 1.350 (3) |
| C (15) -C (21)    | 1.442 (3) |
| C (16) -C (17)    | 1.452 (3) |
| C (16) -H (16)    | 0.9500    |
| C (17) -C (18)    | 1.398 (3) |
| C (17) -C (19)    | 1.411 (3) |
| C (18) -C (19) #1 | 1.377 (3) |
| C (18) -H (18)    | 0.9500    |
| C (19) -C (18) #1 | 1.377 (3) |
| C (21) -N (1)     | 1.143 (3) |
| C (20) -H (20A)   | 0.9800    |
| C (20) -H (20B)   | 0.9800    |
| C (20) -H (20C)   | 0.9800    |



|                        |             |
|------------------------|-------------|
| C (19) -O (2) -C (20)  | 117.79 (16) |
| C (9) -O (1) -C (8)    | 118.09 (18) |
| O (1) -C (8) -C (5)    | 106.66 (19) |
| O (1) -C (8) -H (8A)   | 110.4       |
| C (5) -C (8) -H (8A)   | 110.4       |
| O (1) -C (8) -H (8B)   | 110.4       |
| C (5) -C (8) -H (8B)   | 110.4       |
| H (8A) -C (8) -H (8B)  | 108.6       |
| C (8) -C (5) -C (4)    | 110.2 (2)   |
| C (8) -C (5) -C (6)    | 110.4 (2)   |
| C (4) -C (5) -C (6)    | 112.7 (2)   |
| C (8) -C (5) -H (5)    | 107.8       |
| C (4) -C (5) -H (5)    | 107.8       |
| C (6) -C (5) -H (5)    | 107.8       |
| C (3) -C (4) -C (5)    | 113.8 (2)   |
| C (3) -C (4) -H (4A)   | 108.8       |
| C (5) -C (4) -H (4A)   | 108.8       |
| C (3) -C (4) -H (4B)   | 108.8       |
| C (5) -C (4) -H (4B)   | 108.8       |
| H (4A) -C (4) -H (4B)  | 107.7       |
| C (7) -C (6) -C (5)    | 117.6 (3)   |
| C (7) -C (6) -H (6A)   | 107.9       |
| C (5) -C (6) -H (6A)   | 107.9       |
| C (7) -C (6) -H (6B)   | 107.9       |
| C (5) -C (6) -H (6B)   | 107.9       |
| H (6A) -C (6) -H (6B)  | 107.2       |
| C (3) -C (2) -C (1)    | 112.5 (3)   |
| C (3) -C (2) -H (2A)   | 109.1       |
| C (1) -C (2) -H (2A)   | 109.1       |
| C (3) -C (2) -H (2B)   | 109.1       |
| C (1) -C (2) -H (2B)   | 109.1       |
| H (2A) -C (2) -H (2B)  | 107.8       |
| C (2) -C (3) -C (4)    | 112.2 (3)   |
| C (2) -C (3) -H (3A)   | 109.2       |
| C (4) -C (3) -H (3A)   | 109.2       |
| C (2) -C (3) -H (3B)   | 109.2       |
| C (4) -C (3) -H (3B)   | 109.2       |
| H (3A) -C (3) -H (3B)  | 107.9       |
| C (6) -C (7) -H (7A)   | 109.5       |
| C (6) -C (7) -H (7B)   | 109.5       |
| H (7A) -C (7) -H (7B)  | 109.5       |
| C (6) -C (7) -H (7C)   | 109.5       |
| H (7A) -C (7) -H (7C)  | 109.5       |
| H (7B) -C (7) -H (7C)  | 109.5       |
| C (2) -C (1) -H (1A)   | 109.5       |
| C (2) -C (1) -H (1B)   | 109.5       |
| H (1A) -C (1) -H (1B)  | 109.5       |
| C (2) -C (1) -H (1C)   | 109.5       |
| H (1A) -C (1) -H (1C)  | 109.5       |
| H (1B) -C (1) -H (1C)  | 109.5       |
| C (11) -C (12) -C (13) | 117.57 (19) |
| C (11) -C (12) -C (15) | 122.42 (18) |
| C (13) -C (12) -C (15) | 120.02 (18) |
| C (14) -C (13) -C (12) | 121.3 (2)   |
| C (14) -C (13) -H (13) | 119.4       |
| C (12) -C (13) -H (13) | 119.4       |
| C (11) -C (10) -C (9)  | 119.14 (19) |

|                           |             |
|---------------------------|-------------|
| C (11) -C (10) -H (10)    | 120.4       |
| C (9) -C (10) -H (10)     | 120.4       |
| C (13) -C (14) -C (9)     | 120.2 (2)   |
| C (13) -C (14) -H (14)    | 119.9       |
| C (9) -C (14) -H (14)     | 119.9       |
| O (1) -C (9) -C (10)      | 124.7 (2)   |
| O (1) -C (9) -C (14)      | 115.46 (19) |
| C (10) -C (9) -C (14)     | 119.81 (19) |
| C (10) -C (11) -C (12)    | 122.0 (2)   |
| C (10) -C (11) -H (11)    | 119.0       |
| C (12) -C (11) -H (11)    | 119.0       |
| C (16) -C (15) -C (21)    | 121.50 (19) |
| C (16) -C (15) -C (12)    | 124.21 (18) |
| C (21) -C (15) -C (12)    | 114.29 (17) |
| C (15) -C (16) -C (17)    | 131.75 (19) |
| C (15) -C (16) -H (16)    | 114.1       |
| C (17) -C (16) -H (16)    | 114.1       |
| C (18) -C (17) -C (19)    | 117.48 (19) |
| C (18) -C (17) -C (16)    | 124.65 (18) |
| C (19) -C (17) -C (16)    | 117.87 (18) |
| C (19) #1 -C (18) -C (17) | 121.79 (19) |
| C (19) #1 -C (18) -H (18) | 119.1       |
| C (17) -C (18) -H (18)    | 119.1       |
| O (2) -C (19) -C (18) #1  | 122.98 (18) |
| O (2) -C (19) -C (17)     | 116.29 (18) |
| C (18) #1 -C (19) -C (17) | 120.72 (18) |
| N (1) -C (21) -C (15)     | 178.2 (2)   |
| O (2) -C (20) -H (20A)    | 109.5       |
| O (2) -C (20) -H (20B)    | 109.5       |
| H (20A) -C (20) -H (20B)  | 109.5       |
| O (2) -C (20) -H (20C)    | 109.5       |
| H (20A) -C (20) -H (20C)  | 109.5       |
| H (20B) -C (20) -H (20C)  | 109.5       |

---

Symmetry transformations used to generate equivalent atoms:  
#1 -x-1, -y-1, -z+2

**Table S4.** Anisotropic displacement parameters ( $\text{\AA}^2 \times 10^3$ ) for **A3**. The anisotropic displacement factor exponent takes the form:  $-2\pi^2[h^2 a^{*2} U_{11} + \dots + 2 h k a^* b^* U_{12}]$ .

|        | U11    | U22    | U33    | U23    | U13    | U12    |
|--------|--------|--------|--------|--------|--------|--------|
| O (2)  | 30 (1) | 10 (1) | 31 (1) | 2 (1)  | 16 (1) | 3 (1)  |
| O (1)  | 32 (1) | 19 (1) | 42 (1) | 7 (1)  | 18 (1) | -1 (1) |
| C (8)  | 36 (1) | 19 (1) | 36 (1) | 3 (1)  | 14 (1) | 4 (1)  |
| C (5)  | 41 (2) | 25 (1) | 45 (2) | 5 (1)  | 19 (1) | 1 (1)  |
| C (4)  | 57 (2) | 30 (1) | 44 (2) | 6 (1)  | 16 (1) | 2 (1)  |
| C (6)  | 63 (2) | 24 (1) | 53 (2) | 6 (1)  | 30 (2) | 5 (1)  |
| C (2)  | 37 (2) | 35 (1) | 48 (2) | 10 (1) | 8 (1)  | 4 (1)  |
| C (3)  | 59 (2) | 30 (1) | 44 (2) | 6 (1)  | 17 (1) | 7 (1)  |
| C (7)  | 95 (3) | 29 (2) | 41 (2) | 2 (1)  | 12 (2) | 9 (2)  |
| C (1)  | 42 (2) | 51 (2) | 36 (2) | 3 (1)  | 7 (1)  | 1 (1)  |
| C (12) | 21 (1) | 14 (1) | 19 (1) | 1 (1)  | 3 (1)  | 1 (1)  |
| C (13) | 23 (1) | 15 (1) | 24 (1) | 2 (1)  | 6 (1)  | 2 (1)  |
| C (10) | 30 (1) | 13 (1) | 26 (1) | 2 (1)  | 7 (1)  | 2 (1)  |
| C (14) | 22 (1) | 21 (1) | 28 (1) | 3 (1)  | 8 (1)  | 2 (1)  |
| C (9)  | 24 (1) | 19 (1) | 25 (1) | 3 (1)  | 6 (1)  | -3 (1) |
| C (11) | 24 (1) | 17 (1) | 26 (1) | 2 (1)  | 8 (1)  | 4 (1)  |
| C (15) | 22 (1) | 13 (1) | 20 (1) | 1 (1)  | 3 (1)  | 1 (1)  |
| C (16) | 22 (1) | 13 (1) | 22 (1) | 2 (1)  | 4 (1)  | 2 (1)  |
| C (17) | 21 (1) | 15 (1) | 18 (1) | 3 (1)  | 4 (1)  | 2 (1)  |
| C (18) | 22 (1) | 14 (1) | 22 (1) | 1 (1)  | 7 (1)  | 4 (1)  |
| C (19) | 24 (1) | 11 (1) | 21 (1) | 2 (1)  | 5 (1)  | 2 (1)  |
| C (21) | 24 (1) | 17 (1) | 23 (1) | 3 (1)  | 9 (1)  | 0 (1)  |
| N (1)  | 34 (1) | 17 (1) | 38 (1) | 1 (1)  | 16 (1) | 2 (1)  |
| C (20) | 30 (1) | 12 (1) | 29 (1) | -1 (1) | 13 (1) | 4 (1)  |

**Table S5.** Hydrogen coordinates ( $\times 10^4$ ) and isotropic displacement parameters ( $\text{\AA}^2 \times 10^3$ ) for

**A3.**

|         | x     | y     | z     | U (eq) |
|---------|-------|-------|-------|--------|
| H (8A)  | 4852  | 2549  | 7683  | 35     |
| H (8B)  | 3359  | 1934  | 6865  | 35     |
| H (5)   | 8274  | 2530  | 6931  | 44     |
| H (4A)  | 6722  | 809   | 5873  | 51     |
| H (4B)  | 5100  | 2007  | 5521  | 51     |
| H (6A)  | 6486  | 4716  | 7191  | 54     |
| H (6B)  | 7668  | 4700  | 6345  | 54     |
| H (2A)  | 6920  | 1661  | 4193  | 47     |
| H (2B)  | 8560  | 485   | 4564  | 47     |
| H (3A)  | 8430  | 3395  | 5219  | 52     |
| H (3B)  | 10078 | 2223  | 5589  | 52     |
| H (7A)  | 3976  | 4335  | 5645  | 82     |
| H (7B)  | 4122  | 5790  | 6230  | 82     |
| H (7C)  | 2795  | 4364  | 6495  | 82     |
| H (1A)  | 10235 | 3035  | 3871  | 64     |
| H (1B)  | 10242 | 1432  | 3446  | 64     |
| H (1C)  | 11888 | 1876  | 4252  | 64     |
| H (13)  | 3782  | -3796 | 7941  | 24     |
| H (10)  | 1739  | 1030  | 8018  | 27     |
| H (14)  | 6118  | -2092 | 7380  | 28     |
| H (11)  | -595  | -697  | 8578  | 26     |
| H (16)  | -2064 | -2232 | 9273  | 23     |
| H (18)  | -2243 | -6147 | 9248  | 23     |
| H (20A) | -8369 | -1677 | 10260 | 35     |
| H (20B) | -6638 | -283  | 10464 | 35     |
| H (20C) | -6675 | -1552 | 11073 | 35     |
